# Supplementary material for: The Implication of Chemotypic Variation on the Anti-Oxidant and Anti-Cancer Activities of Sutherlandia frutescens (L.) R.Br. (Fabaceae) from Different Geographic Locations
Source: MDPI journal article supplement (doi:10.3390/antiox9020152), 2020-02-13
Supplement: s1 [file s1]

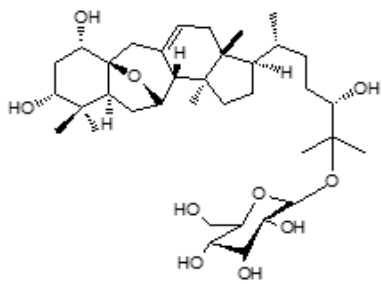

Sutherlandioside A

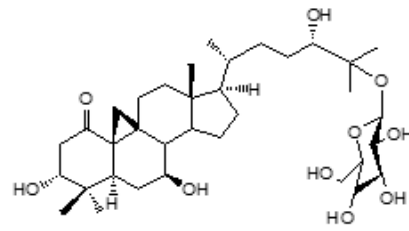

Sutherlandioside B

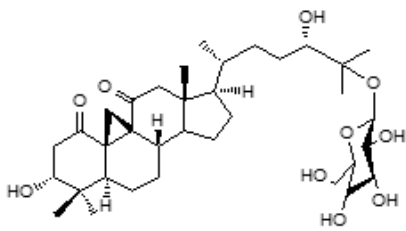

Sutherlandioside C

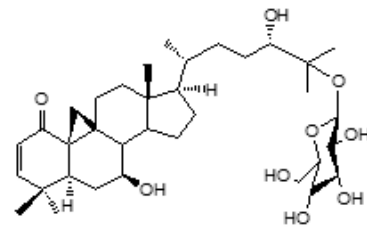

Sutherlandioside D

**Figure S1** Structures of terpenoidal saponins (sutherlandiosides) specific to *Sutherlandia frutescens* extracts

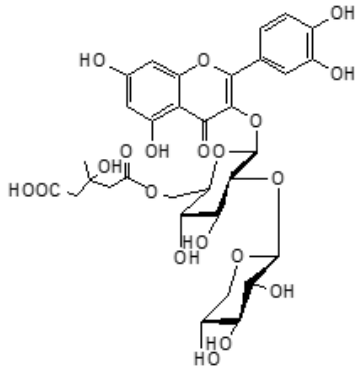

Sutherlandin A (Quercetin)

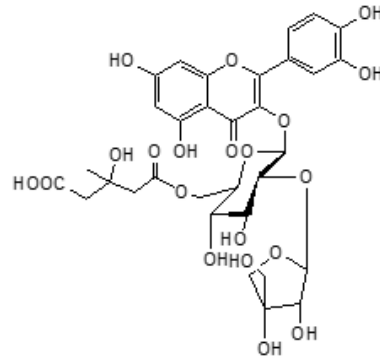

Sutherlandin B

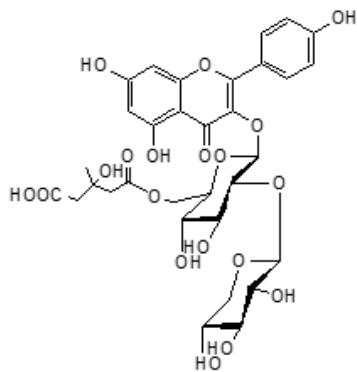

Sutherlandin C (Kaempferol)

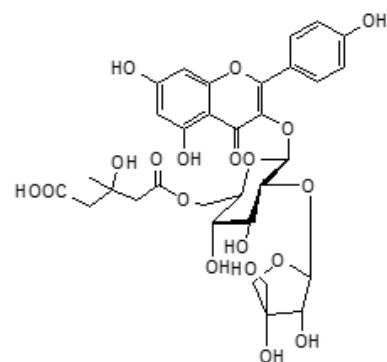

Sutherlandin D

**Figure S2.** Structures of flavonoids specific (sutherlandins) to *Sutherlandia frutescens* extracts.

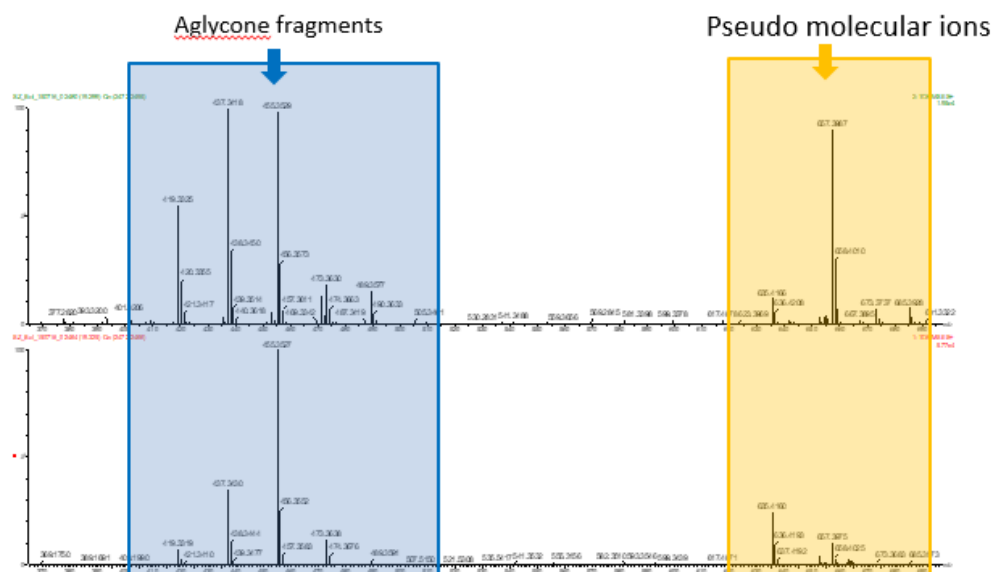

**Figure S3.** Example MS spectra showing the low energy scan below and the high energy scan above, with the typical sutherlandioside aglycone fragments, m/z 455, 437, 419, 473 and 489 and the M+H (m/z 653), and, M+Na (m/z 657) ions.
